# Supplementary material
Source: ML conference proceedings conference paper supplement (https://openreview.net/forum?id=Qx8lUU8CzQ)
Supplement: supplementary_material [file attachment]

# Qualitative Results

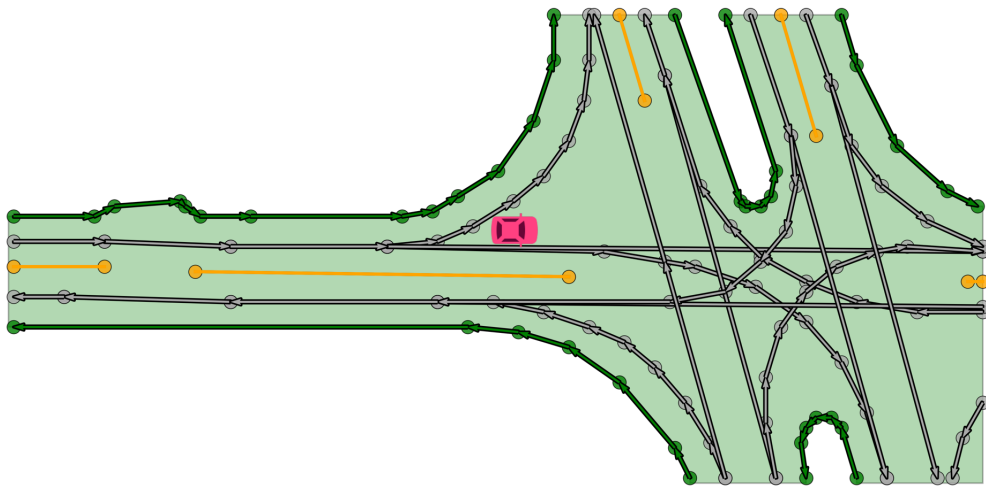

Ground Truth

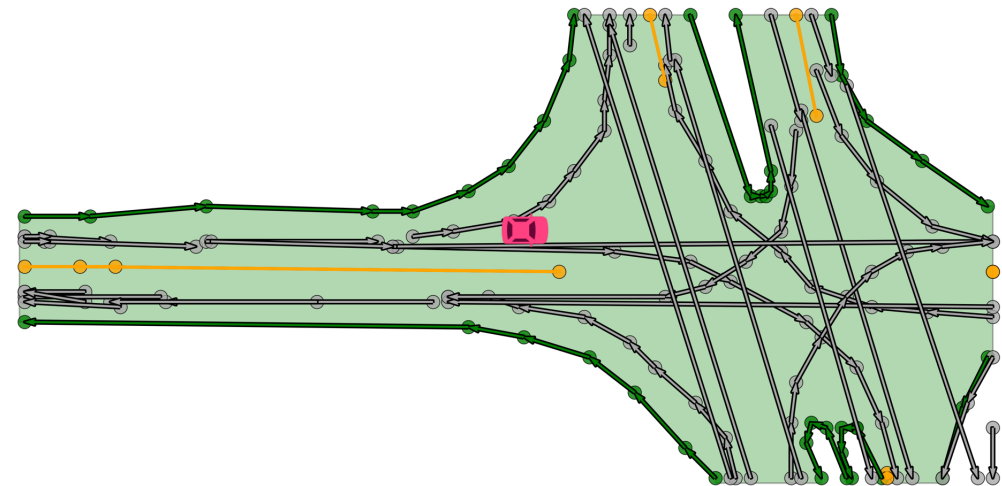

VectorMapNet

# Qualitative Results

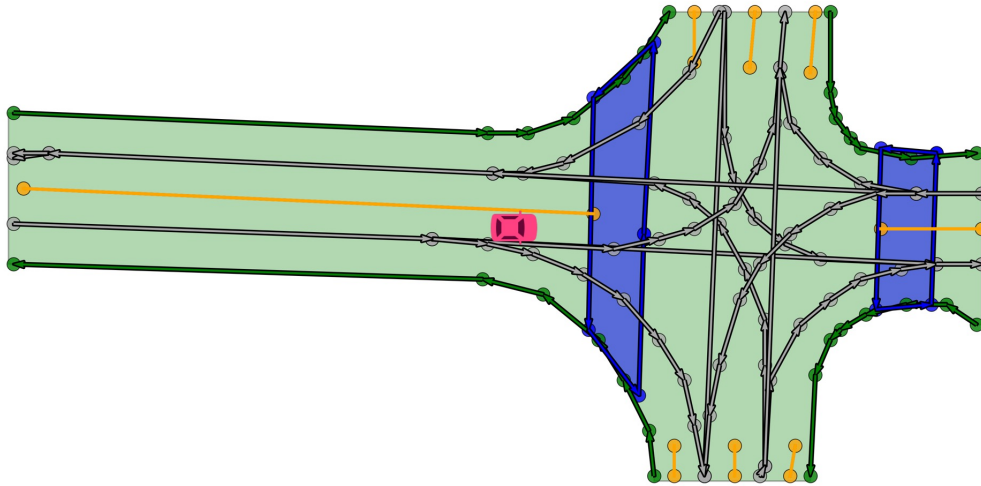

Ground Truth

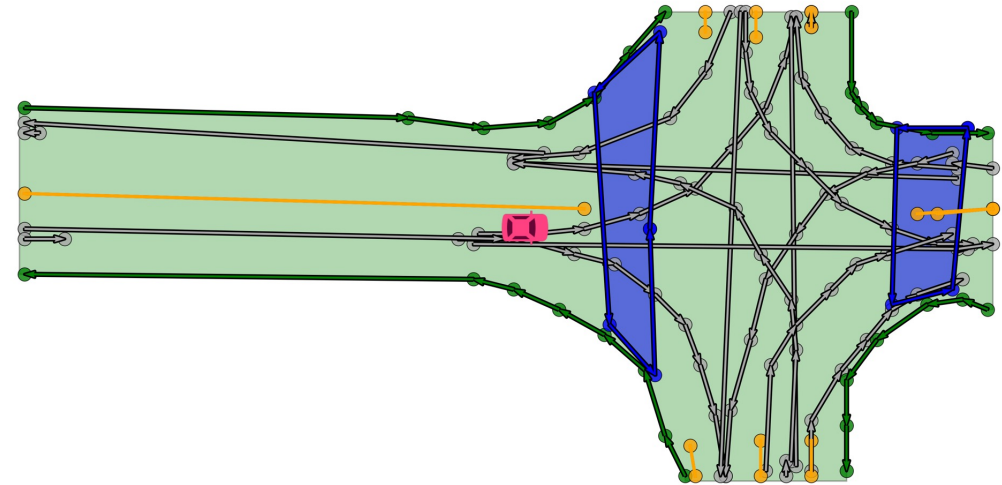

VectorMapNet
